# Supplementary material
Source: PubMed Central journal article supplement (PMC9398993)
Supplement: NIHMS1820064-supplement-Supplementary_Information.pdf [file NIHMS1820064-supplement-Supplementary_Information.pdf]

---

**Supplementary information**

---

**Simplified Cas13-based assays for the fast identification of SARS-CoV-2 and its variants**

---

In the format provided by the authors and unedited

## Contents

- Supplementary Fig. 1** | Selection of most active S gene crRNA.
- Supplementary Fig. 2** | SHINE assay comparison.
- Supplementary Fig. 3** | RNase inactivation in saliva by FastAmp lysis reagent.
- Supplementary Fig. 4** | Inactivated sample input is increased in SHINEv.2.
- Supplementary Fig. 5** | The activity of SHINE is preserved after lyophilization.
- Supplementary Fig. 6** | SHINEv.2 can be transported overseas and is stable for at least 5 months.
- Supplementary Fig. 7** | SHINEv.2 has an analytical sensitivity of 200cp/μL.
- Supplementary Fig. 8** | SHINEv.2 results on population-representative clinical samples.
- Supplementary Fig. 9** | SHINEv.2 results on clinical samples.
- Supplementary Fig. 10** | BinaxNow results on clinical samples.
- Supplementary Fig. 11** | CareStart results on clinical samples.
- Supplementary Fig. 12** | Selection of ancestral (anc) and derived (der) crRNAs for the S gene 69/70 deletion assay.
- Supplementary Fig. 13** | Location of the SHINEv.2 assay for the 69/70 deletion detection.
- Supplementary Fig. 14** | Performance of 69/70 deletion assay on synthetic RNA targets.
- Supplementary Fig. 15** | Performance of 417 SNP detection assay on synthetic RNA targets.
- Supplementary Fig. 16** | Lateral flow detection of Alpha VOC in contrived clinical samples.
- Supplementary Fig. 17** | Effect of PEG on flow through the strip.
- Supplementary Fig. 18** | Effect of PEG concentration on SHINE performance.
- Supplementary Fig. 19** | Performance of equipment-free SHINEv.2 at room temperature.
- Supplementary Fig. 20** | Temperature has a limited effect on Cas13-based detection.
- Supplementary Table 1** | Patient sample information.
- Supplementary Table 2** | Oligonucleotides used in this study.

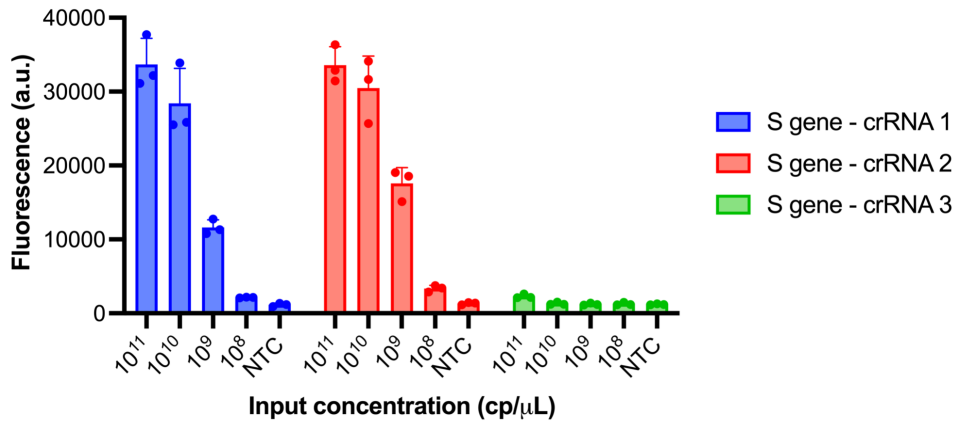

**Supplementary Fig. 1 | Selection of most active S gene crRNA.** Cas13a detection of synthetic RNA target (S gene) using different crRNAs. NTC, no target control. Centre = mean and error bar = standard deviation (s.d.) for 3 technical replicates.

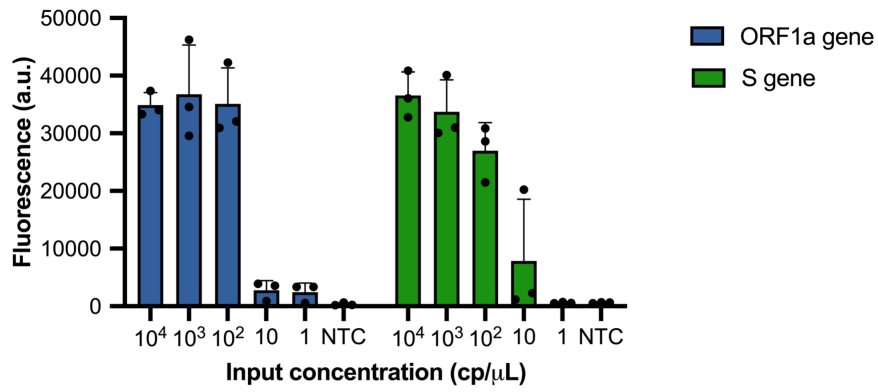

**Supplementary Fig. 2 | SHINE assay comparison.** Background-subtracted fluorescence of the ORF1a and S gene SHINE assays using synthetic SARS-CoV-2 RNA after 90 minutes. NTC, no target control. Centre=mean and error bars=s.d. for 3 technical replicates.



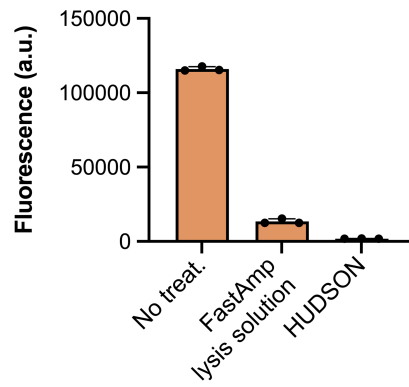

**Supplementary Fig. 3 | RNase inactivation in saliva by FastAmp lysis solution.** RNase activity in pooled saliva samples untreated or treated with FastAmp Lysis reagent supplemented with 5% RNase inhibitor or treated with HUDSON (a heat- and chemical- treatment). Activity measured using RNaseAlert at room temperature for 30 minutes. Centre = mean and error bars = s.d. for 3 technical replicates.

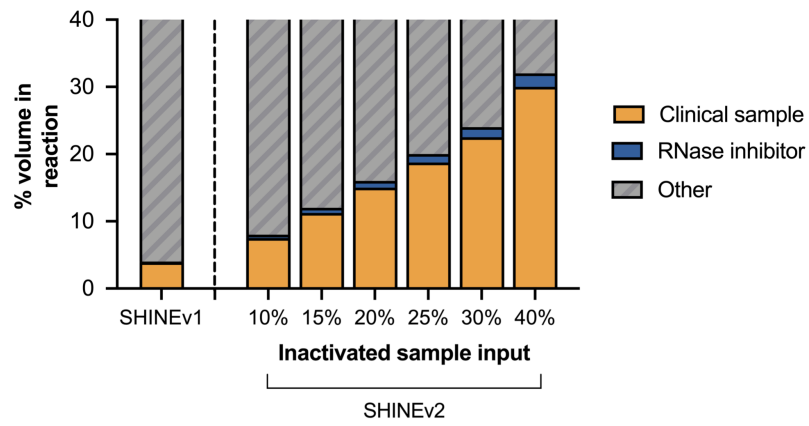

**Supplementary Fig. 4 | Inactivated sample input is increased in SHINEv.2.** Volume (%) of clinical sample and RNase inhibitor in the final reaction for SHINEv.1 and SHINEv.2 as a function of inactivated sample input.

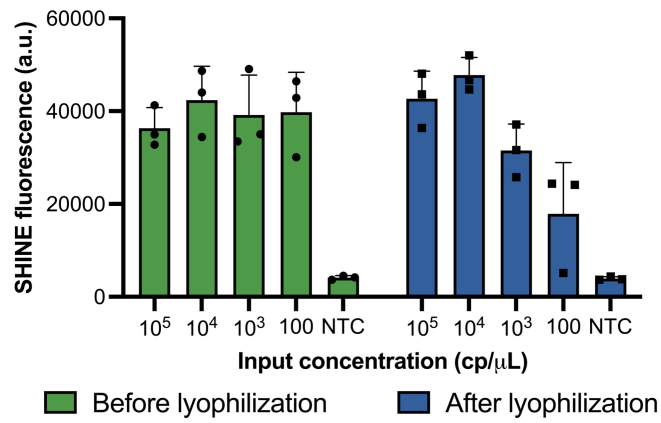

**Supplementary Fig. 5 | The activity of SHINE is preserved after lyophilization.** SHINE fluorescence on synthetic RNA target before and after lyophilization. Fluorescence measured after 90 minutes. NTC, no target control. Centre=mean and error bars=s.d. for 3 technical replicates.

Broad Institute, USA. t = 0

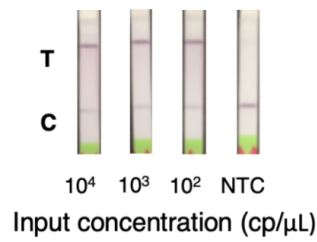

Broad Institute, USA. t = 6 weeks

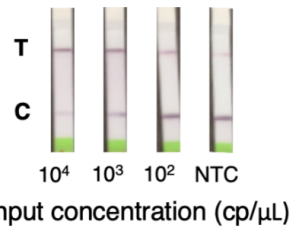

ACEGID, Nigeria. t = 6 weeks

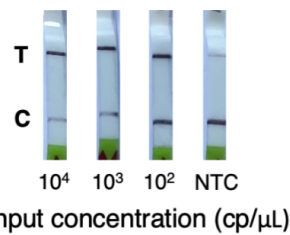

Broad Institute, USA. t = 5 months

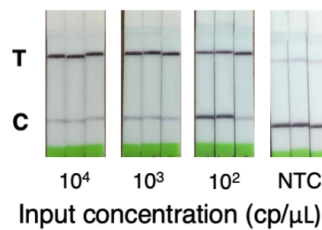

**Supplementary Fig. 6 | SHINEv.2 can be transported overseas and is stable for at least 5 months.**

Lateral flow detection of full-genome synthetic RNA standards in lysis solution-treated UTM using SHINEv.2, before or after transportation, and after various lengths in storage. SHINEv.2 tests after 5-month storage tested in triplicate. Incubated for 90 minutes. C = control band; T = test band; NTC = no target control.

**Target concentration: 500 cp/μL**

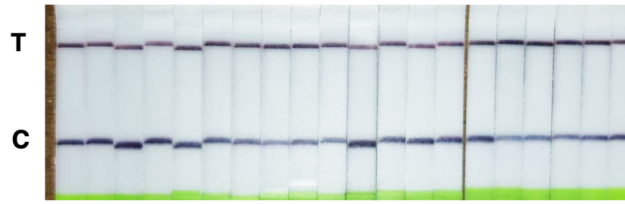

**Target concentration: 100 cp/μL**

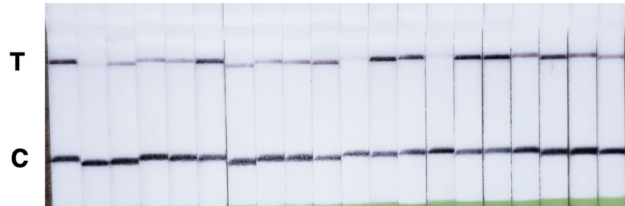

**Target concentration: 50 cp/μL**

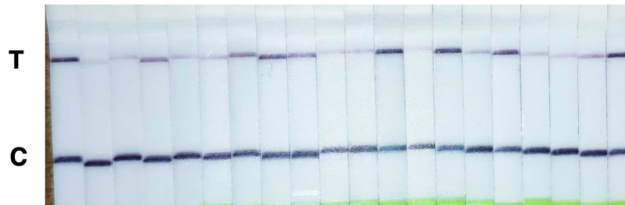

**Supplementary Fig. 7 | SHINEv.2 has an analytical sensitivity of 200cp/μL.** Determination of analytical limit of detection with 20 replicates of SHINEv.2 at different concentrations of SARS-CoV-2 RNA from lysis solution-treated contrived samples. Incubated for 90 minutes. Results for 200cp/μL sample input shown in Fig. 1i.

|               |     |     |     |     |     |     |     |     |     |     |     |     |     |     |     |     |
|---------------|-----|-----|-----|-----|-----|-----|-----|-----|-----|-----|-----|-----|-----|-----|-----|-----|
| <b>Sample</b> | S1  | S2  | S3  | S4  | S5  | S6  | S7  | S8  | S9  | S10 | S11 | S12 | S13 | S14 | S15 | S16 |
| <b>Test</b>   |     |     |     |     |     |     |     |     |     |     |     |     |     |     |     |     |
| <b>Sample</b> | S17 | S18 | S19 | S20 | S21 | S22 | S23 | S24 | S25 | S26 | S27 | S28 | S29 | S30 | S31 | S32 |
| <b>Test</b>   |     |     |     |     |     |     |     |     |     |     |     |     |     |     |     |     |
| <b>Sample</b> | S33 | S34 | S35 | S36 | S37 | S38 | S39 | S40 | S41 | S42 | S43 | S44 | S45 | S46 | S47 | S48 |
| <b>Test</b>   |     |     |     |     |     |     |     |     |     |     |     |     |     |     |     |     |
| <b>Sample</b> | S65 | S66 | S67 | S68 | S69 | S70 | S65 | S66 | S67 | S68 | S69 | S70 | S65 | S66 | S67 | S68 |
| <b>Test</b>   |     |     |     |     |     |     |     |     |     |     |     |     |     |     |     |     |
| <b>Sample</b> | S65 | S66 | S67 | S68 | S69 | S70 | S71 | S72 |     |     |     |     |     |     |     |     |
| <b>Test</b>   |     |     |     |     |     |     |     |     |     |     |     |     |     |     |     |     |

**Supplementary Fig. 8 | SHINEv.2 results on population-representative clinical samples.** Images of positive and negative test results with SHINEv.2 on unextracted nasopharyngeal swab samples. Samples were incubated for 90 minutes at 37°C.

|               |      |      |      |      |      |      |      |      |      |      |      |      |      |      |      |      |
|---------------|------|------|------|------|------|------|------|------|------|------|------|------|------|------|------|------|
| <b>Sample</b> | S73  | S74  | S75  | S76  | S77  | S78  | S79  | S80  | S81  | S82  | S83  | S84  | S85  | S86  | S87  | S88  |
| <b>Test</b>   |      |      |      |      |      |      |      |      |      |      |      |      |      |      |      |      |
| <b>Sample</b> | S89  | S90  | S91  | S92  | S93  | S94  | S95  | S96  | S97  | S98  | S99  | S100 | S101 | S102 | S103 | S104 |
| <b>Test</b>   |      |      |      |      |      |      |      |      |      |      |      |      |      |      |      |      |
| <b>Sample</b> | S105 | S106 | S107 | S108 | S109 | S110 | S111 | S112 | S113 | S114 | S115 | S116 | S117 | S118 | S119 | S120 |
| <b>Test</b>   |      |      |      |      |      |      |      |      |      |      |      |      |      |      |      |      |
| <b>Sample</b> | S121 | S122 | S123 | S124 | S125 | S126 | S127 | S128 | S129 | S130 | S131 | S132 | S133 | S134 | S135 | S136 |
| <b>Test</b>   |      |      |      |      |      |      |      |      |      |      |      |      |      |      |      |      |
| <b>Sample</b> | S137 | S138 | S139 | S140 | S141 | S142 | S143 | S144 | S145 | S146 | S147 | S148 | S149 | S150 | S151 | S152 |
| <b>Test</b>   |      |      |      |      |      |      |      |      |      |      |      |      |      |      |      |      |
| <b>Sample</b> | S153 | S154 | S155 | S156 | S157 | S158 | S159 | S160 | S161 | S162 | S163 | S164 | S165 | S166 | S167 | S168 |
| <b>Test</b>   |      |      |      |      |      |      |      |      |      |      |      |      |      |      |      |      |

**Supplementary Fig. 9 | SHINEv.2 results on clinical samples.** Images of positive and negative test results with SHINEv.2 on unextracted nasopharyngeal swab samples. Samples were incubated for 90 minutes at 37°C.

|               |                                                                                     |                                                                                     |                                                                                     |                                                                                     |                                                                                     |                                                                                     |                                                                                      |                                                                                       |                                                                                       |                                                                                       |
|---------------|-------------------------------------------------------------------------------------|-------------------------------------------------------------------------------------|-------------------------------------------------------------------------------------|-------------------------------------------------------------------------------------|-------------------------------------------------------------------------------------|-------------------------------------------------------------------------------------|--------------------------------------------------------------------------------------|---------------------------------------------------------------------------------------|---------------------------------------------------------------------------------------|---------------------------------------------------------------------------------------|
| <b>Sample</b> | S73                                                                                 | S74                                                                                 | S75                                                                                 | S76                                                                                 | S77                                                                                 | S78                                                                                 | S79                                                                                  | S80                                                                                   | S81                                                                                   | S82                                                                                   |
| <b>Test</b>   |    |    |    |    |    |    |    |    |    |    |
| <b>Sample</b> | S83                                                                                 | S84                                                                                 | S85                                                                                 | S86                                                                                 | S87                                                                                 | S88                                                                                 | S89                                                                                  | S90                                                                                   | S91                                                                                   | S92                                                                                   |
| <b>Test</b>   |    |    |    |    |    |    |    |    |    |    |
| <b>Sample</b> | S93                                                                                 | S94                                                                                 | S95                                                                                 | S96                                                                                 | S97                                                                                 | S98                                                                                 | S99                                                                                  | S100                                                                                  | S101                                                                                  | S102                                                                                  |
| <b>Test</b>   |    |    |    |    |    |    |    |    |    |    |
| <b>Sample</b> | S103                                                                                | S104                                                                                | S105                                                                                | S106                                                                                | S107                                                                                | S108                                                                                | S109                                                                                 | S110                                                                                  | S111                                                                                  | S112                                                                                  |
| <b>Test</b>   |    |    |    |    |    |    |    |    |    |    |
| <b>Sample</b> | S113                                                                                | S114                                                                                | S115                                                                                | S116                                                                                | S117                                                                                | S118                                                                                | S119                                                                                 | S120                                                                                  | S121                                                                                  | S122                                                                                  |
| <b>Test</b>   |    |    |    |    |    |    |    |    |    |    |
| <b>Sample</b> | S123                                                                                | S124                                                                                | S125                                                                                | S126                                                                                | S127                                                                                | S128                                                                                | S129                                                                                 | S130                                                                                  | S131                                                                                  | S132                                                                                  |
| <b>Test</b>   |   |   |   |   |   |   |   |   |   |   |
| <b>Sample</b> | S133                                                                                | S134                                                                                | S135                                                                                | S136                                                                                | S137                                                                                | S138                                                                                | S139                                                                                 | S140                                                                                  | S141                                                                                  | S142                                                                                  |
| <b>Test</b>   |  |  |  |  |  |  |  |  |  |  |
| <b>Sample</b> | S143                                                                                | S144                                                                                | S145                                                                                | S146                                                                                | S147                                                                                | S148                                                                                | S149                                                                                 | S150                                                                                  | S151                                                                                  | S152                                                                                  |
| <b>Test</b>   |  |  |  |  |  |  |  |  |  |  |
| <b>Sample</b> | S153                                                                                | S154                                                                                | S155                                                                                | S156                                                                                | S157                                                                                | S158                                                                                | S159                                                                                 | S160                                                                                  | S161                                                                                  | S162                                                                                  |
| <b>Test</b>   |  |  |  |  |  |  |  |  |  |  |
| <b>Sample</b> | S163                                                                                | S164                                                                                | S165                                                                                | S166                                                                                | S167                                                                                | S168                                                                                |                                                                                      |                                                                                       |                                                                                       |                                                                                       |
| <b>Test</b>   |  |  |  |  |  |  |                                                                                      |                                                                                       |                                                                                       |                                                                                       |

**Supplementary Fig. 10 | BinaxNow results on clinical samples.** Images of positive and negative test results with BinaxNow on unextracted NP swab samples.



|               |                                                                                     |                                                                                     |                                                                                     |                                                                                     |                                                                                     |                                                                                     |                                                                                     |                                                                                     |                                                                                      |                                                                                       |                                                                                       |                                                                                       |
|---------------|-------------------------------------------------------------------------------------|-------------------------------------------------------------------------------------|-------------------------------------------------------------------------------------|-------------------------------------------------------------------------------------|-------------------------------------------------------------------------------------|-------------------------------------------------------------------------------------|-------------------------------------------------------------------------------------|-------------------------------------------------------------------------------------|--------------------------------------------------------------------------------------|---------------------------------------------------------------------------------------|---------------------------------------------------------------------------------------|---------------------------------------------------------------------------------------|
| <b>Sample</b> | S73                                                                                 | S74                                                                                 | S75                                                                                 | S76                                                                                 | S77                                                                                 | S78                                                                                 | S79                                                                                 | S80                                                                                 | S81                                                                                  | S82                                                                                   | S83                                                                                   | S84                                                                                   |
| <b>Test</b>   | 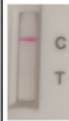   |    |    |    |    |    |    |    |    |    |    |    |
| <b>Sample</b> | S85                                                                                 | S86                                                                                 | S87                                                                                 | S88                                                                                 | S89                                                                                 | S90                                                                                 | S91                                                                                 | S92                                                                                 | S93                                                                                  | S94                                                                                   | S95                                                                                   | S96                                                                                   |
| <b>Test</b>   |    |    |    |    |    |    |    |    |    |    |    |    |
| <b>Sample</b> | S97                                                                                 | S98                                                                                 | S99                                                                                 | S100                                                                                | S101                                                                                | S102                                                                                | S103                                                                                | S104                                                                                | S105                                                                                 | S106                                                                                  | S107                                                                                  | S108                                                                                  |
| <b>Test</b>   |    |    |    |    |    |    |    |    |    |    |    |    |
| <b>Sample</b> | S109                                                                                | S110                                                                                | S111                                                                                | S112                                                                                | S113                                                                                | S114                                                                                | S115                                                                                | S116                                                                                | S117                                                                                 | S118                                                                                  | S119                                                                                  | S120                                                                                  |
| <b>Test</b>   |    |    |    |    |    |    |    |    |    |    |    |    |
| <b>Sample</b> | S121                                                                                | S122                                                                                | S123                                                                                | S124                                                                                | S125                                                                                | S126                                                                                | S127                                                                                | S128                                                                                | S129                                                                                 | S130                                                                                  | S131                                                                                  | S132                                                                                  |
| <b>Test</b>   |   |   |   |   |   |   |   |   |   |   |   |   |
| <b>Sample</b> | S133                                                                                | S134                                                                                | S135                                                                                | S136                                                                                | S137                                                                                | S138                                                                                | S139                                                                                | S140                                                                                | S141                                                                                 | S142                                                                                  | S143                                                                                  | S144                                                                                  |
| <b>Test</b>   |  |  |  |  |  |  |  |  |  |  |  |  |
| <b>Sample</b> | S145                                                                                | S146                                                                                | S147                                                                                | S148                                                                                | S149                                                                                | S150                                                                                | S151                                                                                | S152                                                                                | S153                                                                                 | S154                                                                                  | S155                                                                                  | S156                                                                                  |
| <b>Test</b>   |  |  |  |  |  |  |  |  |  |  |  |  |
| <b>Sample</b> | S157                                                                                | S158                                                                                | S159                                                                                | S160                                                                                | S161                                                                                | S162                                                                                | S163                                                                                | S164                                                                                | S165                                                                                 | S166                                                                                  | S167                                                                                  | S168                                                                                  |
| <b>Test</b>   |  |  |  |  |  |  |  |  |  |  |  |  |

**Supplementary Fig. 11 | CareStart results on clinical samples.** Images of positive and negative test results with CareStart on unextracted nasopharyngeal NP swab samples.

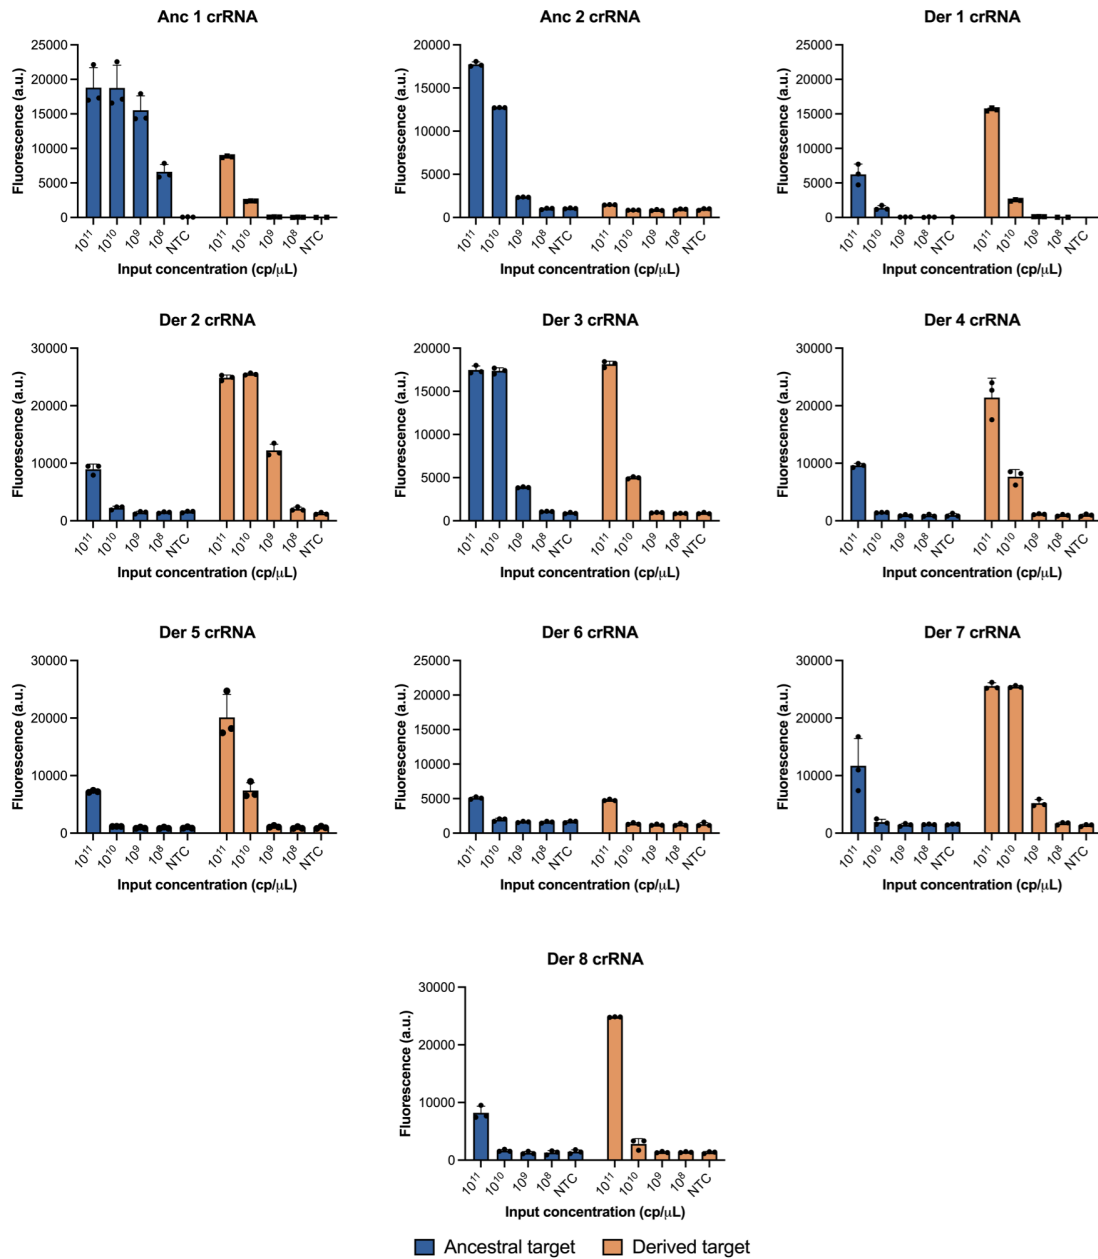

**Supplementary Fig. 12 | Selection of ancestral (anc) and derived (der) crRNAs for the S gene 69/70 deletion assay.** Cas13a detection of ancestral and derived synthetic RNA targets with different anc and der crRNAs. NTC, no target control. Centre = mean and error bar = standard deviation (s.d.) for 3 technical replicates.

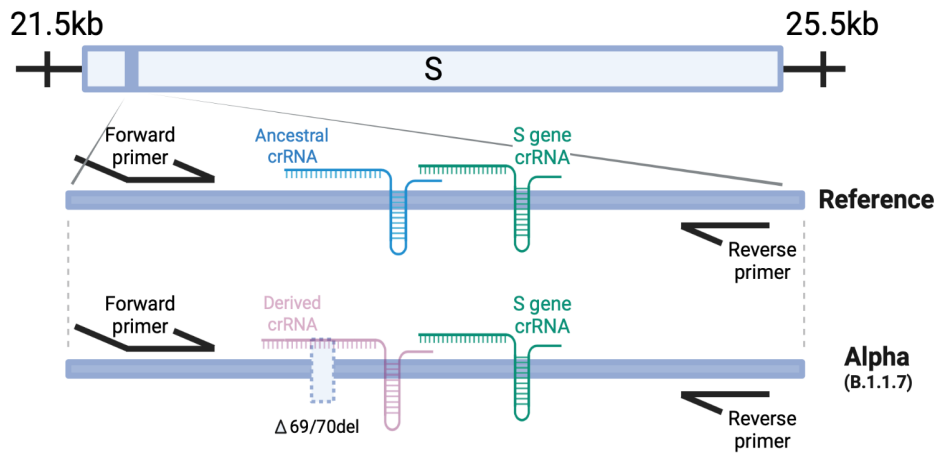

**Supplementary Fig. 13 | Location of the SHINEv.2 assay for the 69/70 deletion detection.** Schematic of location of the S gene and 69/70 deletion SHINEv.2 assays within the S gene of SARS-CoV-2 for the reference strain and Alpha VOC. Dashed rectangle, deletion at amino acid positions 69 and 70 in the S gene ( $\Delta 69/70$ del).

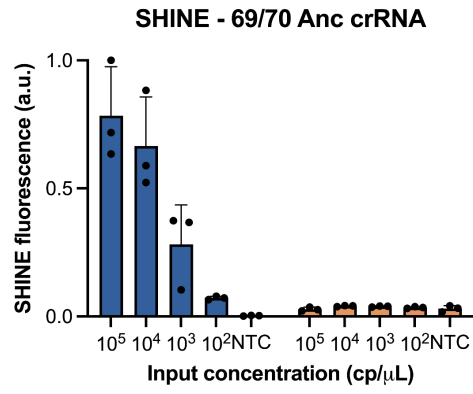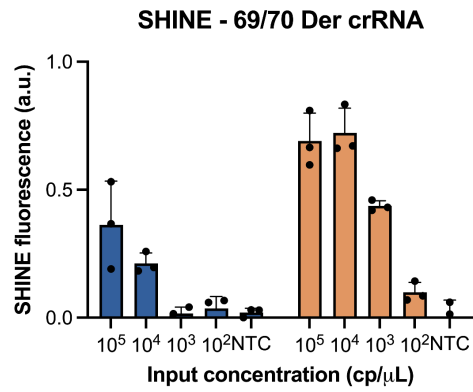

■ Ancestral target     ■ Derived target

**Supplementary Fig. 14 | Performance of 69/70 deletion assay on synthetic RNA targets.** SHINE fluorescence of the 69/70 ancestral (anc) and derived (der) assays on synthetic SARS-CoV-2 RNA targets after 90 minutes. NTC, no target control. Centre = mean and error bars = s.d. for 3 technical replicates.

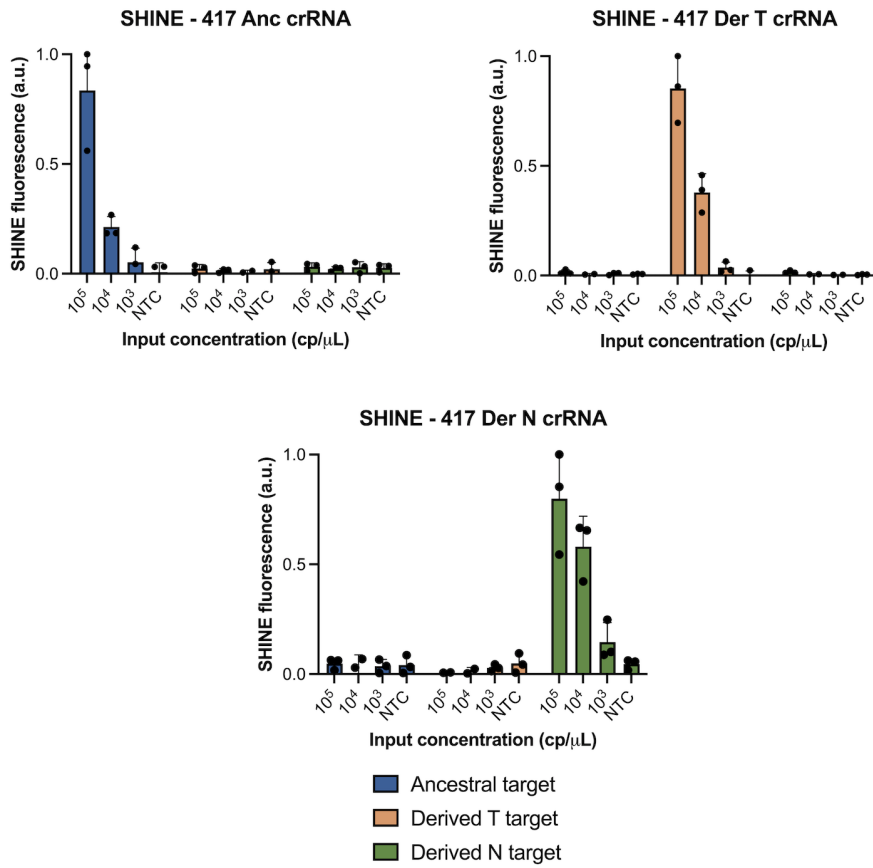

**Supplementary Fig. 15 | Performance of 417 SNP detection assay on synthetic RNA targets.** SHINE fluorescence of the 417 ancestral (anc), derived T (der T) and derived N (der N) assays on synthetic SARS-CoV-2 RNA targets after 90 minutes. NTC, no target control. Centre = mean and error bars = s.d. for 3 technical replicates.

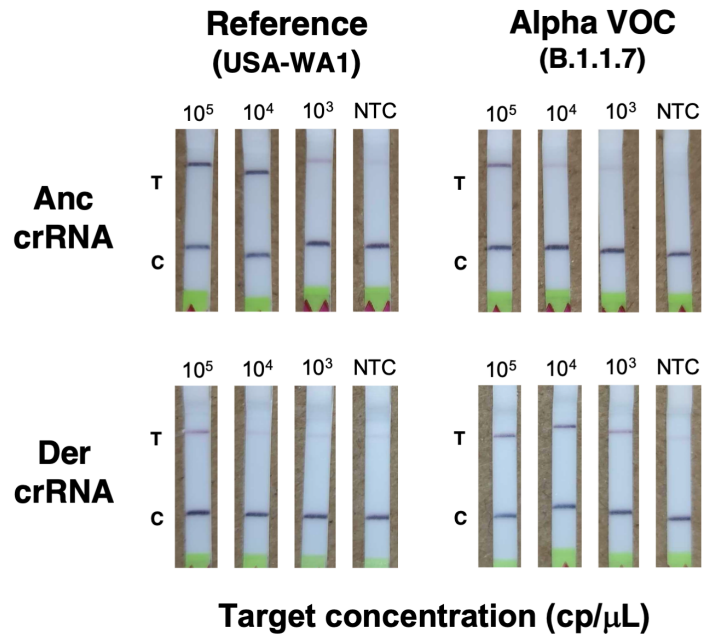

**Supplementary Fig. 16 | Lateral flow detection of Alpha VOC in contrived clinical samples.**

Colorimetric lateral-flow-based detection of SARS-CoV-2 RNA in contrived clinical samples using the 69/70 SHINEv.2 assay. SHINEv.2 incubation time: 90 minutes. NTC, no-target control. T, test line; C, control line.

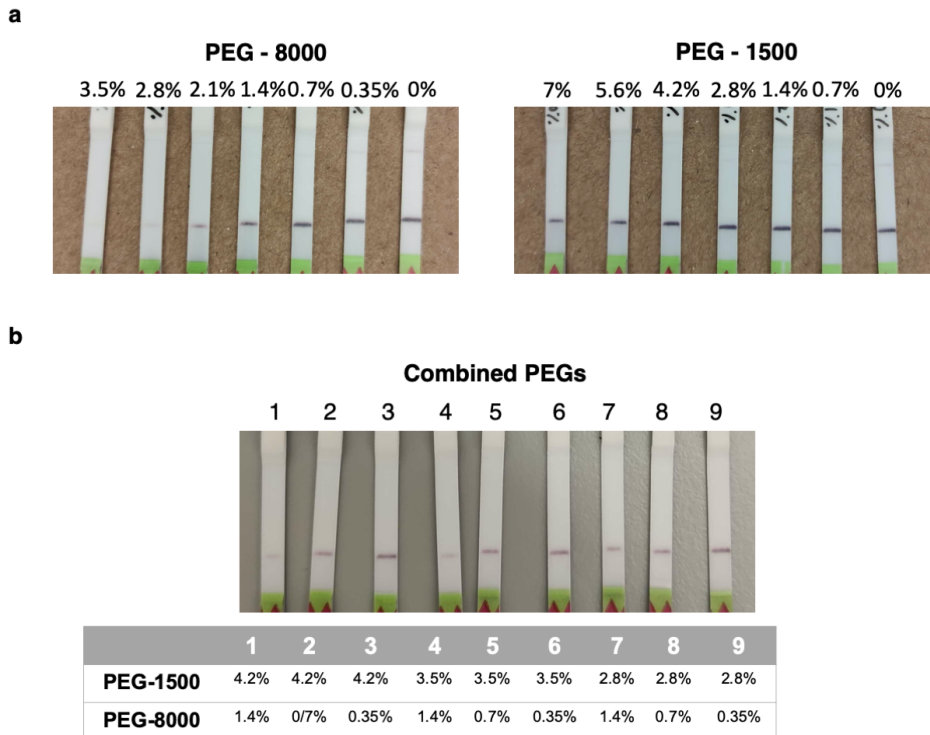

**Supplementary Fig. 17 | Effect of PEG on flow through the strip. (a,b),** images of lateral flow strips from SHINEv.2 reactions using PEGs with different molecular weights and concentrations **(a)** separately and **(b)** in combination, in the absence of an RNA target.

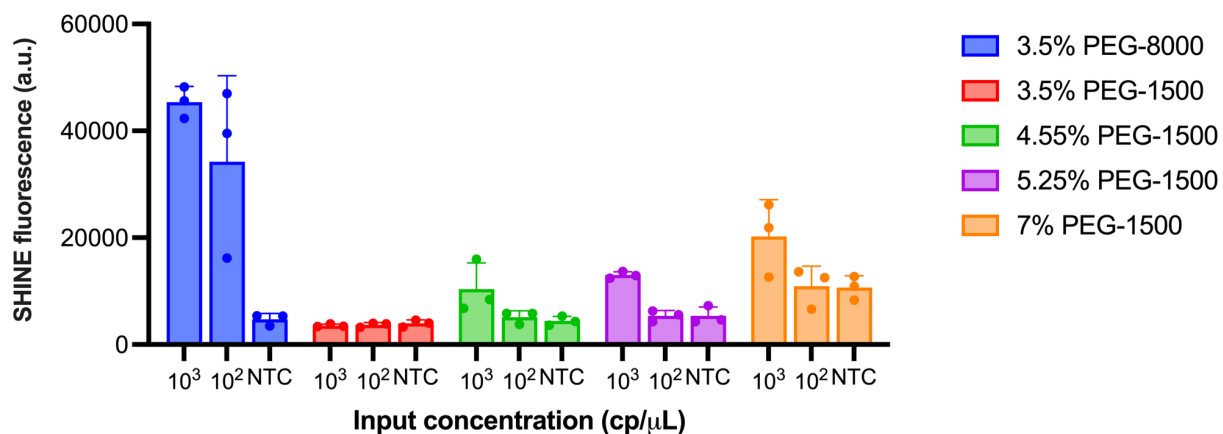

**Supplementary Fig. 18 | Effect of PEG concentration on SHINE performance.** SHINE fluorescence on synthetic SARS-CoV-2 RNA targets (S gene) relative to PEG molecular weight and concentration. Reactions incubated for 90 minutes. NTC, no target control. Centre=mean and error bars=s.d. for 3 technical replicates.



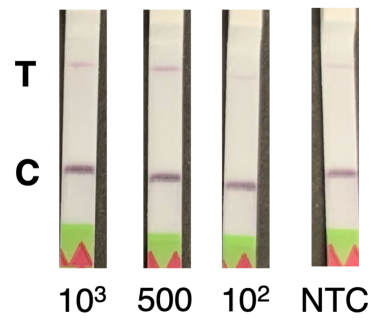

Input concentration (cp/ $\mu$ L)

**Supplementary Fig. 19 | Performance of equipment-free SHINEv.2 at room temperature.** Lateral flow detection of full genome synthetic RNA standards in lysis solution-treated UTM using SHINEv.2, after a 90 minute incubation at 25°C. C = control band; T = test band; NTC = no target control.

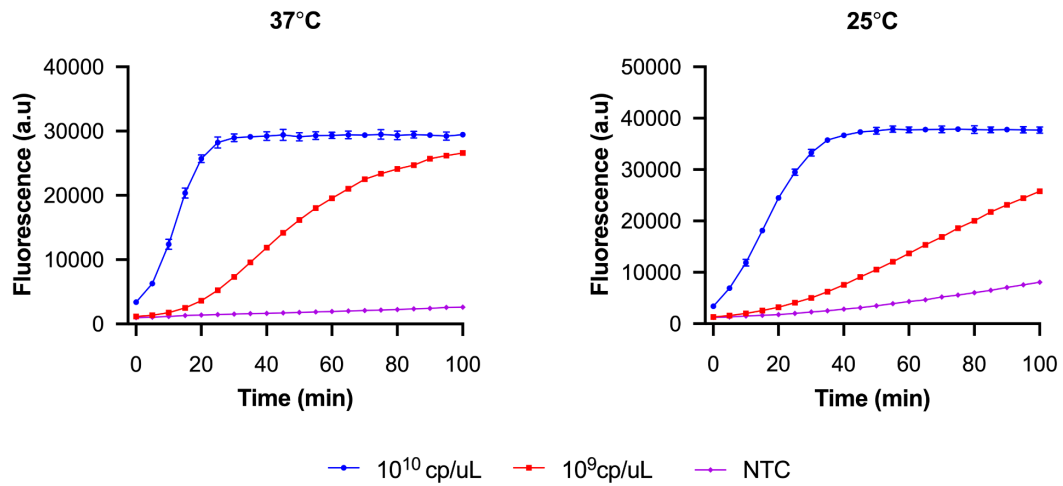

**Supplementary Fig. 20 | Temperature has a limited effect on Cas13-based detection.** Cas13-detection of synthetic RNA target (S gene) at 37°C and 25°C. NTC, no target control. Centre = mean and error bar = standard deviation (s.d.) for 3 technical replicates.

**Supplementary Table 1 | Patient sample information.**

Samples S1 - S168 and VOC01 - VOC12 were used without extraction, whereas RNA was extracted from samples E1 - E20 before use. See *methods* for details. UTM, universal viral transport medium; VTM, viral transport medium; RP, RNase P; n.d., not determined.

| SHINEv.2 sample ID | Sample matrix | N1 viral titer (copies/ $\mu$ L) | N1 Ct | N2 Ct | RP Ct | Figures              |
|--------------------|---------------|----------------------------------|-------|-------|-------|----------------------|
| S1                 | VTM           | 486092                           | 19.3  | 23.7  | 32.4  | Supplementary Fig. 8 |
| S2                 | VTM           | 37355                            | 23.2  | 25    | 36.9  | Supplementary Fig. 8 |
| S3                 | VTM           | 33470                            | 23.3  | 24.5  | 32.9  | Supplementary Fig. 8 |
| S4                 | VTM           | 209                              | 30.8  | 32.2  | 33.8  | Supplementary Fig. 8 |
| S5                 | VTM           | 128108                           | 21.3  | 22.9  | 32.5  | Supplementary Fig. 8 |
| S6                 | VTM           | 312                              | 30.1  | 32.1  | 33.1  | Supplementary Fig. 8 |
| S7                 | VTM           | 482212                           | 19.3  | 21.5  | 34.1  | Supplementary Fig. 8 |
| S8                 | VTM           | 1110                             | 28.5  | 30.5  | 34.1  | Supplementary Fig. 8 |
| S9                 | VTM           | 24475                            | 23.8  | 25.5  | 31.2  | Supplementary Fig. 8 |
| S10                | VTM           | 3256                             | 26.8  | 28.7  | 32.4  | Supplementary Fig. 8 |
| S11                | VTM           | 1520                             | 28    | 30.1  | 29.7  | Supplementary Fig. 8 |
| S12                | VTM           | 6051                             | 25.9  | 27.8  | 28.5  | Supplementary Fig. 8 |
| S13                | VTM           | 780                              | 29    | 31.1  | 30.7  | Supplementary Fig. 8 |
| S14                | VTM           | 2013                             | 27.6  | 29.7  | 31.7  | Supplementary Fig. 8 |
| S15                | VTM           | 597551                           | 19    | 20.5  | 34.5  | Supplementary Fig. 8 |
| S16                | VTM           | 981                              | 28.6  | 31    | 34    | Supplementary Fig. 8 |
| S17                | VTM           | 324715                           | 19.9  | 21.1  | 35.2  | Supplementary Fig. 8 |
| S18                | VTM           | 133                              | 32    | 32.6  | 28.8  | Supplementary Fig. 8 |
| S19                | VTM           | 156186                           | 21    | 22.5  | 31.7  | Supplementary Fig. 8 |
| S20                | VTM           | 1010050                          | 18.2  | 19.2  | 28.7  | Supplementary Fig. 8 |
| S21                | VTM           | 102                              | 32.9  | 33.2  | 32.7  | Supplementary Fig. 8 |
| S22                | VTM           | 9731                             | 25.2  | 26.3  | 33.7  | Supplementary Fig. 8 |
| S23                | VTM           | 7591                             | 25.6  | 27.1  | 30.9  | Supplementary Fig. 8 |
| S24                | VTM           | 81                               | 33.4  | 34    | 26.7  | Supplementary Fig. 8 |
| S25                | VTM           | 5332                             | 25.8  | 26.6  | 36.2  | Supplementary Fig. 8 |
| S26                | VTM           | 727                              | 29    | 29.9  | 31.3  | Supplementary Fig. 8 |
| S27                | VTM           | 15654                            | 24    | 24.6  | 26.5  | Supplementary Fig. 8 |
| S28                | VTM           | 25046                            | 23.3  | 23.5  | 34.6  | Supplementary Fig. 8 |
| S29                | VTM           | 21779                            | 23.5  | 23.4  | 30.3  | Supplementary Fig. 8 |
| S30                | VTM           | 7215                             | 25.3  | 25.1  | 30.3  | Supplementary Fig. 8 |
| S31                | VTM           | 2455                             | 27    | 27.8  | 34.4  | Supplementary Fig. 8 |
| S32                | VTM           | 3162                             | 26.6  | 27    | 29.8  | Supplementary Fig. 8 |

|     |     |        |      |      |      |                      |
|-----|-----|--------|------|------|------|----------------------|
| S33 | VTM | 3179   | 26.6 | 26.8 | 33.6 | Supplementary Fig. 8 |
| S34 | VTM | 55277  | 22   | 22.2 | 34   | Supplementary Fig. 8 |
| S35 | VTM | 291593 | 19.3 | 19   | 33.8 | Supplementary Fig. 8 |
| S36 | VTM | 37000  | 22.7 | 22.9 | 33.3 | Supplementary Fig. 8 |
| S37 | VTM | 484666 | 18.5 | 18.6 | 31.7 | Supplementary Fig. 8 |
| S38 | VTM | 59845  | 21.9 | 22.5 | 29.9 | Supplementary Fig. 8 |
| S39 | VTM | 268003 | 19.4 | 19.4 | 27.2 | Supplementary Fig. 8 |
| S40 | VTM | 15899  | 24   | 24.6 | 33.4 | Supplementary Fig. 8 |
| S41 | VTM | 43486  | 22.4 | 23   | 28.3 | Supplementary Fig. 8 |
| S42 | VTM | 16193  | 24   | 24.2 | 31   | Supplementary Fig. 8 |
| S43 | VTM | -      | -    | -    | 31.4 | Supplementary Fig. 8 |
| S44 | VTM | -      | -    | -    | 31.3 | Supplementary Fig. 8 |
| S45 | VTM | -      | -    | -    | 31.8 | Supplementary Fig. 8 |
| S46 | VTM | -      | -    | -    | 33.8 | Supplementary Fig. 8 |
| S47 | VTM | -      | -    | -    | 33.4 | Supplementary Fig. 8 |
| S48 | VTM | -      | -    | -    | 36   | Supplementary Fig. 8 |
| S49 | VTM | -      | -    | -    | 34.4 | Supplementary Fig. 8 |
| S50 | VTM | -      | -    | -    | 32.7 | Supplementary Fig. 8 |
| S51 | VTM | -      | -    | -    | 35.5 | Supplementary Fig. 8 |
| S52 | VTM | -      | -    | -    | 33   | Supplementary Fig. 8 |
| S53 | VTM | -      | -    | -    | 33.1 | Supplementary Fig. 8 |
| S54 | VTM | -      | -    | -    | 32.6 | Supplementary Fig. 8 |
| S55 | VTM | -      | -    | -    | 33.8 | Supplementary Fig. 8 |
| S56 | VTM | -      | -    | -    | 31.6 | Supplementary Fig. 8 |
| S57 | VTM | -      | -    | -    | 28.3 | Supplementary Fig. 8 |
| S58 | VTM | -      | -    | -    | 30.7 | Supplementary Fig. 8 |
| S59 | VTM | -      | -    | -    | 30   | Supplementary Fig. 8 |
| S60 | VTM | -      | -    | -    | 31.2 | Supplementary Fig. 8 |
| S61 | VTM | -      | -    | -    | 29.9 | Supplementary Fig. 8 |
| S62 | VTM | -      | -    | -    | 31.9 | Supplementary Fig. 8 |
| S63 | VTM | -      | -    | -    | 31.3 | Supplementary Fig. 8 |
| S64 | VTM | -      | -    | -    | 31   | Supplementary Fig. 8 |
| S65 | VTM | -      | -    | -    | 31.8 | Supplementary Fig. 8 |
| S66 | VTM | -      | -    | -    | 33.3 | Supplementary Fig. 8 |
| S67 | VTM | -      | -    | -    | 32.9 | Supplementary Fig. 8 |
| S68 | VTM | -      | -    | -    | 31.1 | Supplementary Fig. 8 |
| S69 | VTM | -      | -    | -    | 32.2 | Supplementary Fig. 8 |

|      |        |        |      |      |      |                         |
|------|--------|--------|------|------|------|-------------------------|
| S70  | VTM    | -      | -    | -    | 31.7 | Supplementary Fig. 8    |
| S71  | VTM    | -      | -    | -    | 31.8 | Supplementary Fig. 8    |
| S72  | VTM    | -      | -    | -    | 31.3 | Supplementary Fig. 8    |
| S73  | VTM    | 883    | 27.8 | 29.3 | 29.7 | Supplementary Fig. 9-11 |
| S74  | VTM    | 1078   | 27.5 | 29   | 26.9 | Supplementary Fig. 9-11 |
| S75  | VTM    | 7      | 35.6 | 37.8 | 31.5 | Supplementary Fig. 9-11 |
| S76  | VTM    | 194575 | 19.4 | 20.3 | 28.9 | Supplementary Fig. 9-11 |
| S77  | VTM    | 107    | 31   | 32.7 | 31.9 | Supplementary Fig. 9-11 |
| S78  | VTM    | 109    | 31   | 33   | 30   | Supplementary Fig. 9-11 |
| S79  | VTM    | 328    | 29   | 31.1 | 24.6 | Supplementary Fig. 9-11 |
| S80  | VTM    | 34     | 33   | 35.1 | 29.5 | Supplementary Fig. 9-11 |
| S81  | VTM    | 778    | 28   | 29.8 | 30   | Supplementary Fig. 9-11 |
| S82  | VTM    | 4739   | 25.2 | 26.9 | 29.3 | Supplementary Fig. 9-11 |
| S83  | VTM    | 33     | 33   | 35.6 | 29.4 | Supplementary Fig. 9-11 |
| S84  | VTM    | 599754 | 17.7 | 18.6 | 29.5 | Supplementary Fig. 9-11 |
| S85  | VTM    | 271    | 29.4 | 31.6 | 29.5 | Supplementary Fig. 9-11 |
| S86  | VTM    | 931    | 27.7 | 29.2 | 29.4 | Supplementary Fig. 9-11 |
| S87  | VTM    | 540    | 28.6 | 30.8 | 29.4 | Supplementary Fig. 9-11 |
| S88  | VTM    | 3281   | 25.7 | 27.9 | 29.1 | Supplementary Fig. 9-11 |
| S89  | VTM    | 739    | 28.1 | 29.8 | 24.6 | Supplementary Fig. 9-11 |
| S90  | Saline | -      | -    | -    | 29.7 | Supplementary Fig. 9-11 |
| S91  | Saline | 232    | 29.6 | 32.2 | 28.2 | Supplementary Fig. 9-11 |
| S92  | Saline | -      | -    | -    | 29   | Supplementary Fig. 9-11 |
| S93  | Saline | 1      | 37.7 | -    | 26.4 | Supplementary Fig. 9-11 |
| S94  | Saline | 3      | 37   | 38.5 | 27.3 | Supplementary Fig. 9-11 |
| S95  | VTM    | 188    | 29.9 | 32.1 | 30.3 | Supplementary Fig. 9-11 |
| S96  | UTM    | 3739   | 25.5 | 27.8 | 28.9 | Supplementary Fig. 9-11 |
| S97  | UTM    | -      | -    | -    | 32.3 | Supplementary Fig. 9-11 |
| S98  | UTM    | -      | -    | -    | 29.8 | Supplementary Fig. 9-11 |
| S99  | UTM    | -      | -    | -    | 30.6 | Supplementary Fig. 9-11 |
| S100 | UTM    | -      | -    | -    | 28.8 | Supplementary Fig. 9-11 |
| S101 | UTM    | -      | -    | -    | 30.2 | Supplementary Fig. 9-11 |
| S102 | UTM    | -      | -    | -    | 29.8 | Supplementary Fig. 9-11 |
| S103 | UTM    | -      | -    | -    | 31.1 | Supplementary Fig. 9-11 |
| S104 | UTM    | -      | -    | -    | 34.1 | Supplementary Fig. 9-11 |
| S105 | UTM    | -      | -    | -    | 30.5 | Supplementary Fig. 9-11 |

|      |     |         |      |      |      |                         |
|------|-----|---------|------|------|------|-------------------------|
| S106 | UTM | -       | -    | -    | 31.7 | Supplementary Fig. 9-11 |
| S107 | UTM | -       | -    | -    | 28.4 | Supplementary Fig. 9-11 |
| S108 | UTM | -       | -    | -    | 30.1 | Supplementary Fig. 9-11 |
| S109 | UTM | -       | -    | -    | 27.4 | Supplementary Fig. 9-11 |
| S110 | UTM | -       | -    | -    | 28.8 | Supplementary Fig. 9-11 |
| S111 | UTM | -       | -    | -    | 29.6 | Supplementary Fig. 9-11 |
| S112 | UTM | -       | -    | -    | 28   | Supplementary Fig. 9-11 |
| S113 | UTM | -       | -    | -    | 30.6 | Supplementary Fig. 9-11 |
| S114 | UTM | -       | -    | -    | 29.7 | Supplementary Fig. 9-11 |
| S115 | UTM | -       | -    | -    | 29.2 | Supplementary Fig. 9-11 |
| S116 | UTM | -       | -    | -    | 31   | Supplementary Fig. 9-11 |
| S117 | UTM | -       | -    | -    | 30   | Supplementary Fig. 9-11 |
| S118 | UTM | -       | -    | -    | 30.8 | Supplementary Fig. 9-11 |
| S119 | UTM | -       | -    | -    | 29.1 | Supplementary Fig. 9-11 |
| S120 | UTM | -       | -    | -    | 27.7 | Supplementary Fig. 9-11 |
| S121 | UTM | 3       | 36.8 | 38.7 | 30   | Supplementary Fig. 9-11 |
| S122 | VTM | -       | -    | -    | 27.7 | Supplementary Fig. 9-11 |
| S123 | VTM | 653     | 28   | 30   | 26.1 | Supplementary Fig. 9-11 |
| S124 | VTM | 193     | 29.8 | 31.8 | 31.3 | Supplementary Fig. 9-11 |
| S125 | VTM | 31094   | 22   | 23.4 | 31.9 | Supplementary Fig. 9-11 |
| S126 | VTM | 1130    | 27.1 | 29.4 | 29.6 | Supplementary Fig. 9-11 |
| S127 | VTM | 527     | 28.3 | 30.7 | 31.8 | Supplementary Fig. 9-11 |
| S128 | VTM | 2323088 | 15.4 | 16.6 | 28.6 | Supplementary Fig. 9-11 |
| S129 | VTM | -       | -    | 37.7 | 32.2 | Supplementary Fig. 9-11 |
| S130 | VTM | 129     | 30.2 | 33.1 | 31.6 | Supplementary Fig. 9-11 |
| S131 | VTM | -       | -    | 38.6 | 30.6 | Supplementary Fig. 9-11 |
| S132 | VTM | 34      | 32.6 | 35   | 30.3 | Supplementary Fig. 9-11 |
| S133 | VTM | 82      | 31.2 | 33.4 | 31.3 | Supplementary Fig. 9-11 |
| S134 | VTM | 10      | 34.5 | 36.7 | 32   | Supplementary Fig. 9-11 |
| S135 | VTM | 1224    | 27   | 29   | 29.1 | Supplementary Fig. 9-11 |
| S136 | VTM | 4       | 36   | 38.3 | 28.2 | Supplementary Fig. 9-11 |
| S137 | UTM | -       | -    | -    | 29.9 | Supplementary Fig. 9-11 |
| S138 | UTM | -       | -    | -    | 30.2 | Supplementary Fig. 9-11 |
| S139 | UTM | -       | -    | -    | 27.8 | Supplementary Fig. 9-11 |
| S140 | UTM | 2       | 37.2 | 39.3 | 31.4 | Supplementary Fig. 9-11 |
| S141 | UTM | 4       | 35.9 | 38.5 | 26.4 | Supplementary Fig. 9-11 |
| S142 | UTM | 3       | 36   | 38.6 | 29.6 | Supplementary Fig. 9-11 |

|      |         |         |      |      |      |                         |
|------|---------|---------|------|------|------|-------------------------|
| S143 | VTM     | 3706009 | 14.7 | 15.8 | 27.3 | Supplementary Fig. 9-11 |
| S144 | VTM     | 3118    | 25.6 | 27.5 | 29.7 | Supplementary Fig. 9-11 |
| S145 | VTM     | 13588   | 23.1 | 24.4 | 28.8 | Supplementary Fig. 9-11 |
| S146 | VTM     | 7       | 34.9 | 37   | 25.8 | Supplementary Fig. 9-11 |
| S147 | VTM     | 1471    | 26.5 | 27.9 | 27.8 | Supplementary Fig. 9-11 |
| S148 | VTM     | 3       | 36.5 | 38.2 | 30.3 | Supplementary Fig. 9-11 |
| S149 | VTM     | 12      | 34.4 | 37.3 | 25.8 | Supplementary Fig. 9-11 |
| S150 | VTM     | 9       | 34.6 | 38   | 29.5 | Supplementary Fig. 9-11 |
| S151 | VTM     | 2925    | 25.5 | 27.2 | 28.1 | Supplementary Fig. 9-11 |
| S152 | VTM     | 345     | 28.8 | 30.2 | 32.1 | Supplementary Fig. 9-11 |
| S153 | VTM     | 5       | 35.6 | 37.5 | 28.3 | Supplementary Fig. 9-11 |
| S154 | VTM     | 20694   | 22.4 | 23.4 | 29.5 | Supplementary Fig. 9-11 |
| S155 | VTM     | 46      | 32   | 33.8 | 30.1 | Supplementary Fig. 9-11 |
| S156 | VTM     | 14      | 33.8 | 36.6 | 29.1 | Supplementary Fig. 9-11 |
| S157 | VTM     | 187051  | 18.9 | 19.9 | 26.1 | Supplementary Fig. 9-11 |
| S158 | VTM     | 21      | 33.3 | 35.1 | 28.8 | Supplementary Fig. 9-11 |
| S159 | VTM     | 13      | 34.2 | 36.6 | 30.8 | Supplementary Fig. 9-11 |
| S160 | VTM     | 412032  | 17.7 | 18.8 | 27.4 | Supplementary Fig. 9-11 |
| S161 | VTM     | 10      | 34.4 | 37.7 | 29.4 | Supplementary Fig. 9-11 |
| S162 | VTM     | 172     | 30   | 32.3 | 28.1 | Supplementary Fig. 9-11 |
| S163 | VTM     | 23      | 33.4 | 35.8 | 26.4 | Supplementary Fig. 9-11 |
| S164 | VTM     | 386     | 28.7 | 29.7 | 30.9 | Supplementary Fig. 9-11 |
| S165 | VTM     | 3907    | 25   | 26.3 | 28.9 | Supplementary Fig. 9-11 |
| S166 | VTM     | 16      | 33.8 | 35   | 31.8 | Supplementary Fig. 9-11 |
| S167 | VTM     | -       | -    | -    | 30.3 | Supplementary Fig. 9-11 |
| S168 | VTM     | 3       | 36.9 | 38.2 | 32.6 | Supplementary Fig. 9-11 |
| E1   | VTM     | 65806   | 20.9 | 20.0 | 28.2 | Fig. 3e                 |
| E2   | UTM     | 23588   | 22.1 | 23.2 | 27.9 | Fig. 3e                 |
| E3   | VTM     | 1213    | 26.8 | 25.8 | 30.6 | Fig. 3e                 |
| E4   | VTM     | 3237    | 25.5 | 26.8 | 31.2 | Fig. 3e                 |
| E5   | VTM     | 753     | 27.3 | 29.3 | 32.1 | Fig. 3e                 |
| E6   | VTM     | 738     | 27.6 | 27.2 | 29.8 | Fig. 3e                 |
| E7   | Unknown | 7804    | 24.1 | 24.2 | 31.2 | Fig. 3e                 |
| E8   | Unknown | 4495    | 24.9 | 24.2 | 29.1 | Fig. 3e                 |
| E9   | Unknown | 291     | 29.0 | 28.6 | 30.0 | Fig. 3e                 |
| E10  | Unknown | 12954   | 23.3 | 23.3 | 33.5 | Fig. 3e                 |
| E11  | UTM     | -       | -    | -    | 32.0 | Fig. 3e                 |

|       |     |       |      |     |      |         |
|-------|-----|-------|------|-----|------|---------|
| E12   | UTM | -     | -    | -   | 30.2 | Fig. 3e |
| E13   | UTM | -     | -    | -   | 30.7 | Fig. 3e |
| E14   | UTM | -     | -    | -   | 29.9 | Fig. 3e |
| E15   | UTM | -     | -    | -   | 30.4 | Fig. 3e |
| E16   | UTM | -     | -    | -   | 29.5 | Fig. 3e |
| E17   | UTM | -     | -    | -   | 30.2 | Fig. 3e |
| E18   | UTM | -     | -    | -   | 33.8 | Fig. 3e |
| E19   | UTM | -     | -    | -   | 30.6 | Fig. 3e |
| E20   | UTM | -     | -    | -   | 31.1 | Fig. 3e |
| VOC01 | VTM | 52016 | 22.2 | n.d | n.d  | Fig. 3f |
| VOC02 | VTM | 1957  | 28.0 | n.d | n.d  | Fig. 3f |
| VOC03 | VTM | 14210 | 24.5 | n.d | n.d  | Fig. 3f |
| VOC04 | VTM | 9888  | 25.1 | n.d | n.d  | Fig. 3f |
| VOC05 | VTM | 5212  | 25.9 | n.d | n.d  | Fig. 3f |
| VOC06 | VTM | 36147 | 23.0 | n.d | n.d  | Fig. 3f |
| VOC07 | VTM | 33457 | 23.1 | n.d | n.d  | Fig. 3f |
| VOC08 | VTM | 17855 | 24.0 | n.d | n.d  | Fig. 3f |
| VOC09 | VTM | -     | -    | n.d | n.d  | Fig. 3f |
| VOC10 | VTM | -     | -    | n.d | n.d  | Fig. 3f |
| VOC11 | VTM | -     | -    | n.d | n.d  | Fig. 3f |
| VOC12 | VTM | -     | -    | n.d | n.d  | Fig. 3f |



**Supplementary Table 2 | Oligonucleotides used in this study.**

| Name                     | Oligo type | Sequence                                                                  | Gene - Assay |
|--------------------------|------------|---------------------------------------------------------------------------|--------------|
| ORF1a crRNA              | crRNA      | GAUUUAGACUACCCCAAAAACGAAGGGGACU<br>AAAACCCUCUUCUUCAGGUUGAAGAGCAGCAG<br>AA | ORF1ab       |
| S gene crRNA - 1         | crRNA      | GAUUUAGACUACCCCAAAAACGAAGGGGACU<br>AAAACUGGUAGGACAGGGUUAUCAAAACCUCU<br>UA | S            |
| S gene crRNA - 2         | crRNA      | GAUUUAGACUACCCCAAAAACGAAGGGGACU<br>AAAACACAGGGUUAUCAAAACCUCUAGUACC<br>AU  | S            |
| S gene crRNA - 3         | crRNA      | GAUUUAGACUACCCCAAAAACGAAGGGGACU<br>AAAACACCAUUUAAUGAUGGUGUUUUAUUUUG<br>CU | S            |
| S - 69/70 anc<br>crRNA 1 | crRNA      | GAUUUAGACUACCCCAAAAACGAAGGGGACU<br>AAAACACCAUUGGUCCCAGAGACAUGUAUAG<br>CA  | S - 69/70    |
| S - 69/70 anc<br>crRNA 2 | crRNA      | GAUUUAGACUACCCCAAAAACGAAGGGGACU<br>AAAACUCCCAGAGACAUGUAUAGCAUGGAAC<br>CA  | S - 69/70    |
| S - 69/70 der<br>crRNA 1 | crRNA      | GAUUUAGACUACCCCAAAAACGAAGGGGACU<br>AAAACCUUAGUACCAUUGGUCCCAGAUUAG<br>CA   | S - 69/70    |
| S - 69/70 der<br>crRNA 2 | crRNA      | GAUUUAGACUACCCCAAAAACGAAGGGGACU<br>AAAACUCCCAGAUUAGCAUGGAACCAAGUAA<br>C   | S - 69/70    |
| S - 69/70 der<br>crRNA 3 | crRNA      | GAUUUAGACUACCCCAAAAACGAAGGGGACU<br>AAAACCAGAUUAGCAUGGAACCAAGUAACAU<br>U   | S - 69/70    |
| S - 69/70 der<br>crRNA 4 | crRNA      | GAUUUAGACUACCCCAAAAACGAAGGGGACU<br>AAAACGGUCCCAGAUUAGCAUGGAACCAAG<br>UA   | S - 69/70    |
| S - 69/70 der<br>crRNA 5 | crRNA      | GAUUUAGACUACCCCAAAAACGAAGGGGACU<br>AAAACUUGGUCCCAGAUUAGCAUGGAACCA<br>AG   | S - 69/70    |
| S - 69/70 der<br>crRNA 6 | crRNA      | GAUUUAGACUACCCCAAAAACGAAGGGGACU<br>AAAACCAUUGGUCCCAGAUUAGCAUGGAAC<br>CA   | S - 69/70    |
| S - 69/70 der<br>crRNA 7 | crRNA      | GAUUUAGACUACCCCAAAAACGAAGGGGACU<br>AAAACACCAUUGGUCCCAGAUUAGCAUGGA<br>AC   | S - 69/70    |
| S - 69/70 der<br>crRNA 8 | crRNA      | GAUUUAGACUACCCCAAAAACGAAGGGGACU<br>AAAACAGTACCATTGGTCCCAGATATAGCATG<br>G  | S - 69/70    |

|                           |                 |                                                                          |               |
|---------------------------|-----------------|--------------------------------------------------------------------------|---------------|
| S - 417 anc crRNA         | crRNA           | GAUUUAGACUACCCCAAAAACGAAGGGGACU<br>AAAACGCATTCTCTCCAGTTTGCCCTGGAGCG<br>A | S - 417       |
| S - 417 derN<br>crRNA     | crRNA           | GAUUUAGACUACCCCAAAAACGAAGGGGACU<br>AAAACUUAUUUAUAUCAGCAACAUCUCCGC<br>A   | S - 417       |
| S - 417 derT<br>crRNA     | crRNA           | GAUUUAGACUACCCCAAAAACGAAGGGGACU<br>AAAACUUAUAUCAGCAGUCGUACCAGUUUGC<br>UA | S - 417       |
| S - 452 anc crRNA         | crRNA           | GAUUUAGACUACCCCAAAAACGAAGGGGACU<br>AAAACGUUCCUAAACAAUCUAUACAGGUAAUC<br>A | S - 452       |
| S - 452 der crRNA         | crRNA           | GAUUUAGACUACCCCAAAAACGAAGGGGACU<br>AAAACCUAUAGCUGUAUUUAUUUACCACCA<br>A   | S - 452       |
| S - 156-158 anc<br>crRNA  | crRNA           | GAUUUAGACUACCCCAAAAACGAAGGGGACU<br>AAAACUAAACUCUGAACUCACUUUCCAUCCAA<br>C | S - 156-158   |
| S - 156-158 der<br>crRNA  | crRNA           | GAUUUAGACUACCCCAAAAACGAAGGGGACU<br>AAAACUAAACUCCACUUUCCAUCCAACUUUUG<br>U | S - 156-158   |
| S - 142-145 anc<br>crRNA  | crRNA           | GAUUUAGACUACCCCAAAAACGAAGGGGACU<br>AAAACUGUUGUUUUUGUGGUAUAACACCC<br>AA   | S - 142-145   |
| S - 142-145 der<br>crRNA  | crRNA           | GAUUUAGACUACCCCAAAAACGAAGGGGACU<br>AAAACUGUUGUUUUUGUGGUCCAAAAAUGGA<br>UC | S - 142-145   |
| RNase P - crRNA           | Cas12a<br>crRNA | UAAUUUCUACUAAGUGUAGAUAGGCCAGCU<br>GGCCCGCUGC                             | RNase P       |
| ORF1a fwd primer          | RPA primer      | GAAATTAATACGACTCACTATAGGGCCAAGGT<br>AAACCTTTGGAATTTGGTGCCAC              | ORF1ab        |
| ORF1a rev primer          | RPA primer      | ACTATCATCATCTAACCAATCTTCTTCTTG                                           | ORF1ab        |
| S/S - 69/70 fwd<br>primer | RPA primer      | GAAATTAATACGACTCACTATAGGGCAACTCA<br>GGACTTGTTCTTACCTTTCTTTTCC            | S & S - 69/70 |
| S/S - 69/70 rev<br>primer | RPA primer      | AAGCAAATAAACACCATCATTAAAT                                                | S & S - 69/70 |
| S - 417 fwd primer        | RPA primer      | GAAATTAATACGACTCACTATAGGGTCTATGCA<br>GATTCATTTGTAATTAGAGGTG              | S - 417       |
| S - 417 rev primer        | RPA primer      | ATAACGCAGCCTGTAAATCATCTGGTAAT                                            | S - 417       |
| S - 452 fwd primer        | RPA primer      | GAAATTAATACGACTCACTATAGGGAGCTTGG<br>AATTCTAACAATCTTGATTCT                | S - 452       |
| S - 452 rev primer        | RPA primer      | AGTTGAAATATCTCTCTCAAAGGTTTGA                                             | S - 452       |

|                                    |            |                                                                                                                                                                                                                                                                                                                                                                                                                                                                                                                                                                                 |             |
|------------------------------------|------------|---------------------------------------------------------------------------------------------------------------------------------------------------------------------------------------------------------------------------------------------------------------------------------------------------------------------------------------------------------------------------------------------------------------------------------------------------------------------------------------------------------------------------------------------------------------------------------|-------------|
| S - 156-158 fwd primer             | RPA primer | GAAATTAATACGACTCACTATAGGGTTTTTGGG<br>TGTTTATTACCACAAAACA                                                                                                                                                                                                                                                                                                                                                                                                                                                                                                                        | S - 156-158 |
| S - 156-158 rev primer             | RPA primer | AGAAAAGGCTGAGAGACATATTCAAAG                                                                                                                                                                                                                                                                                                                                                                                                                                                                                                                                                     | S - 156-158 |
| S - 156-158 fwd primer             | RPA primer | GAAATTAATACGACTCACTATAGGGGCTACTAA<br>TGTTGTTATTAAAGTCTGTGAA                                                                                                                                                                                                                                                                                                                                                                                                                                                                                                                     | S - 142-145 |
| S - 156-158 rev primer             | RPA primer | CTAGAATAAACTCTGAACTCACTTTCCATC                                                                                                                                                                                                                                                                                                                                                                                                                                                                                                                                                  | S - 142-145 |
| RNase P Fwd primer                 | RPA primer | GAAATTAATACGACTCACTATAGGGGTGGAAT<br>ACACCCTTAGGAAAAGGCTTC                                                                                                                                                                                                                                                                                                                                                                                                                                                                                                                       | RNase P     |
| RNase P Rev primer                 | RPA primer | CAAGCCGTGAATGTAGATCTCAGAGCAC                                                                                                                                                                                                                                                                                                                                                                                                                                                                                                                                                    | RNase P     |
| ORF1a synthetic RNA target         | gBlock     | GAAATTAATACGACTCACTATAGGGGTGAGTTT<br>AAATTGGCTTCACATATGTATTGTTCTTTCTAC<br>CCTCCAGATGAGGATGAAGAAGAAGGTGATTG<br>TGAAGAAGAAGAGTTTGAGCCATCAACTCAAT<br>ATGAGTATGGTACTGAAGATGATTACCAAGGT<br>AAACCTTTGGAATTTGGTGCCACTTCTGCTGCT<br>CTTCAACCTGAAGAAGAGCAAGAAGAAGATTG<br>GTTAGATGATGATAGTCAACAACTGTTGGTCA<br>ACAAGACGGCAGTGAGGACAATCAGACAATA<br>CTATTCAAACAATTGTTGAGGTTCAACCTCAAT<br>TAGAGATGGAACCTACACCAGTTGTTCCAGACT<br>ATTGAAGTGAATAGTTTTAGTGGTTATTTAAAA<br>CTTACTGACAATGTATACATTAATAATGCAGAC<br>ATTGTGGAAGAAGCTAAAAAGGTAAAACCAAC<br>AGTGGTTGTTAATGCAGCCAATGTTTACCTTAA<br>ACATGGAGGAGG | ORF1ab      |
| S - 69/70 anc synthetic RNA target | gBlock     | GAAATTAATACGACTCACTATAGGTGACAAAGT<br>TTTCAGATCCTCAGTTTTACATTCAACTCAGGA<br>CTTGTTCTTACCTTTCTTTTCCAATGTTACTTGG<br>TTCCATGCTATACATGTCTCTGGGACCAATGG<br>TACTAAGAGGTTTGATAACCCTGTCCTACCATT<br>TAATGATGGTGTATTTTTGCTTCCACTGAGAA<br>GTCTAACATAATAAGAGGCTGGATTTTTGGTAC<br>TACTTTAGATTTCGAAGACCCAGTCCCTACTTAT<br>TGTTAATAACGCTACTAATGTTGTTATTAAGT<br>CTGTGAATTTCAATTTTGTAAATGATCC                                                                                                                                                                                                        | S - 69/70   |
| S - 69/70 der synthetic RNA target | gBlock     | GAAATTAATACGACTCACTATAGGTGACAAAGT<br>TTTCAGATCCTCAGTTTTACATTCAACTCAGGA<br>CTTGTTCTTACCTTTCTTTTCCAATGTTACTTGG<br>TTCCATGCTATATCTGGGACCAATGGTACTAA<br>GAGGTTTGATAACCCTGTCCTACCATTTAATGA<br>TGGTGTATTTTTGCTTCCACTGAGAAGTCTAA<br>CATAATAAGAGGCTGGATTTTTGGTACTACTTT<br>AGATTTCGAAGACCCAGTCCCTACTTATTGTTAA<br>TAACGCTACTAATGTTGTTATTAAGTCTGTGA                                                                                                                                                                                                                                        | S - 69/70   |

|                                   |        |                                                                                                                                                                                                                                                                                                                                                                                                                                                                         |         |
|-----------------------------------|--------|-------------------------------------------------------------------------------------------------------------------------------------------------------------------------------------------------------------------------------------------------------------------------------------------------------------------------------------------------------------------------------------------------------------------------------------------------------------------------|---------|
|                                   |        | ATTTCAATTTTGTAAATGATCC                                                                                                                                                                                                                                                                                                                                                                                                                                                  |         |
| S - 417 anc synthetic RNA target  | gBlock | GAAATTAATACGACTCACTATAGGTCTATGCAG<br>ATTCATTTGTAATTAGAGGTGATGAAGTCAGAC<br>AAATCGCTCCAGGGCAAACCTGGAAGATTGCT<br>GATTATAATTATAAATTACCAGATGATTTTACAG<br>GCTGCGTTATAGCTTGGAATTCTAACAATCTTG<br>ATTCTAAGGTTGGTGGTAATTATAATTACCTGT<br>ATAGATTGTTTAGGAAGTCTAATCTCAAACCTT<br>TTGAGAGAGATATTTCAACTGAAATCTATCAGG<br>CCGGTAGCACACCTTGTAATGGTGTGGAAGGT<br>TTTAATTGTTACTTTCTTTACAATCATATGGTT<br>TCCAACCCACTAATGGTGTGTTACCAACCA<br>TACAGAGTAGTAGTACTTTCTTTTGAACCTTCTA<br>CATGCACCAGCAA  | S - 417 |
| S - 417 derN synthetic RNA target | gBlock | GAAATTAATACGACTCACTATAGGTCTATGCAG<br>ATTCATTTGTAATTAGAGGTGATGAAGTCAGAC<br>AAATCGCTCCAGGGCAAACCTGGAATATTGCT<br>GATTATAATTATAAATTACCAGATGATTTTACAG<br>GCTGCGTTATAGCTTGGAATTCTAACAATCTTG<br>ATTCTAAGGTTGGTGGTAATTATAATTACCTGT<br>ATAGATTGTTTAGGAAGTCTAATCTCAAACCTT<br>TTGAGAGAGATATTTCAACTGAAATCTATCAGG<br>CCGGTAGCACACCTTGTAATGGTGTGGAAGGT<br>TTTAATTGTTACTTTCTTTACAATCATATGGTT<br>TCCAACCCACTAATGGTGTGTTACCAACCA<br>TACAGAGTAGTAGTACTTTCTTTTGAACCTTCTA<br>CATGCACCAGCAA  | S - 417 |
| S - 417 derT synthetic RNA target | gBlock | GAAATTAATACGACTCACTATAGGTCTATGCAG<br>ATTCATTTGTAATTAGAGGTGATGAAGTCAGAC<br>AAATCGCTCCAGGGCAAACCTGGAACGATTGCT<br>GATTATAATTATAAATTACCAGATGATTTTACAG<br>GCTGCGTTATAGCTTGGAATTCTAACAATCTTG<br>ATTCTAAGGTTGGTGGTAATTATAATTACCTGT<br>ATAGATTGTTTAGGAAGTCTAATCTCAAACCTT<br>TTGAGAGAGATATTTCAACTGAAATCTATCAGG<br>CCGGTAGCACACCTTGTAATGGTGTGGAAGGT<br>TTTAATTGTTACTTTCTTTACAATCATATGGTT<br>TCCAACCCACTAATGGTGTGTTACCAACCA<br>TACAGAGTAGTAGTACTTTCTTTTGAACCTTCTA<br>CATGCACCAGCAA | S - 417 |
| S - 452 anc synthetic RNA target  | gBlock | GAAATTAATACGACTCACTATAGGGTCTATGCA<br>GATTCATTTGTAATTAGAGGTGATGAAGTCAGA<br>CAAATCGCTCCAGGGCAAACCTGGAAGATTGC<br>TGATTATAATTATAAATTACCAGATGATTTTACA<br>GGCTGCGTTATAGCTTGGAATTCTAACAATCTT<br>GATTCTAAGGTTGGTGGTAATTATAATTACCTG<br>TATAGATTGTTTAGGAAGTCTAATCTCAAACCT<br>TTTGAGAGAGATATTTCAACTGAAATCTATCAG<br>GCCGGTAGCACACCTTGTAATGGTGTGGAAGG                                                                                                                                | S - 452 |

|                                            |        |                                                                                                                                                                                                                                                                                                                                                                                                                                                                        |             |
|--------------------------------------------|--------|------------------------------------------------------------------------------------------------------------------------------------------------------------------------------------------------------------------------------------------------------------------------------------------------------------------------------------------------------------------------------------------------------------------------------------------------------------------------|-------------|
|                                            |        | TTTTAATTGTTACTTTTCCTTTACAATCATATGGT<br>TTCCAACCCACTAATGGTGTGGTTACCAACC<br>ATACAGAGTAGTAGTACTTTCTTTTGAACCTCT<br>ACATGCACCAGCAA                                                                                                                                                                                                                                                                                                                                          |             |
| S - 452 der<br>synthetic RNA<br>target     | gBlock | GAAATTAATACGACTCACTATAGGGTCTATGCA<br>GATTCATTTGTAATTAGAGGTGATGAAGTCAGA<br>CAAATCGCTCCAGGGCAAACCTGGAAAGATTGC<br>TGATTATAATTATAAATTACCAGATGATTTTACA<br>GGCTGCGTTATAGCTTGAATTCTAACAATCTT<br>GATTCTAAGTTGGTGGTAATTATAATTACCGG<br>TATAGATTGTTTAGGAAGTCTAATCTCAAACCT<br>TTTGAGAGAGATATTTCAACTGAAATCTATCAG<br>GCCGGTAGCAAACCTTGAATGGTGTGAAGG<br>TTTTAATTGTTACTTTTCCTTTACAATCATATGGT<br>TTCCAACCCACTAATGGTGTGGTTACCAACC<br>ATACAGAGTAGTAGTACTTTCTTTTGAACCTCT<br>ACATGCACCAGCAA | S - 452     |
| S - 156-158 anc<br>synthetic RNA<br>target | gBlock | GAAATTAATACGACTCACTATAGGGCTACTTAT<br>TGTTAATAACGCTACTAATGTTGTTATTAAGT<br>CTGTGAATTTCAATTTTGAATGATCCATTTTGG<br>GGTGTATTATTACCACAAAAACAACAAAAGTTGG<br>ATGGAAAGTGAGTTCAGAGTTTATTCTAGTGC<br>GAATAATTGCACCTTTGAATATGTCTCTCAGCC<br>TTTTCTTATGGACCTTGAAGGAAAACAGGGTAA<br>TTTCAAAAATCTTAGGGAATTTGTGTTAAGAA<br>T                                                                                                                                                                | S - 156-158 |
| S - 156-158 der<br>synthetic RNA<br>target | gBlock | GAAATTAATACGACTCACTATAGGGCTACTTAT<br>TGTTAATAACGCTACTAATGTTGTTATTAAGT<br>CTGTGAATTTCAATTTTGAATGATCCATTTTGG<br>GGTGTATTATTACCACAAAAACAACAAAAGTTGG<br>ATGGAAAGTGAGTTCAGAGTTTATTCTAGTGC<br>GAATAATTGCACCTTTGAATATGTCTCTCAGCC<br>TTTTCTTATGGACCTTGAAGGAAAACAGGGTAA<br>TTTCAAAAATCTTAGGGAATTTGTGTTAAGAA<br>T                                                                                                                                                                | S - 156-158 |
| S - 142-145 anc<br>synthetic RNA<br>target | gBlock | GAAATTAATACGACTCACTATAGGGGCTGGAT<br>TTTTGGTACTACTTTAGATTCGAAGACCCAGTC<br>CCTACTTATTGTTAATAACGCTACTAATGTTGT<br>TATTAAGTCTGTGAATTTCAATTTTGAATGAT<br>CCATTTTGGGTGTTTATTACCACAAAAACAAC<br>AAAAGTTGGATGGAAAGTGAGTTCAGAGTTTA<br>TTCTAGTGCGAATAATTGCACCTTTTGAATATGT<br>CTCTCAGCCTTTTCTTATGGACCTTGAAGGAAA<br>ACAGGGTAATTT                                                                                                                                                      | S - 142-145 |
| S - 142-145 der<br>synthetic RNA<br>target | gBlock | GAAATTAATACGACTCACTATAGGGGCTGGAT<br>TTTTGGTACTACTTTAGATTCGAAGACCCAGTC<br>CCTACTTATTGTTAATAACGCTACTAATGTTGT<br>TATTAAGTCTGTGAATTTCAATTTTGAATGAT<br>CCATTTTGGACCACAAAAACAACAAAAGTTGG<br>ATGGAAAGTGAGTTCAGAGTTTATTCTAGTGC                                                                                                                                                                                                                                                 | S - 142-145 |

|                                 |                              |                                                                                                                                                                                                                                                                                                                                                                                                                                                                                                                                                              |         |
|---------------------------------|------------------------------|--------------------------------------------------------------------------------------------------------------------------------------------------------------------------------------------------------------------------------------------------------------------------------------------------------------------------------------------------------------------------------------------------------------------------------------------------------------------------------------------------------------------------------------------------------------|---------|
|                                 |                              | GAATAATTGCACCTTTTGAATATGTCTCTCAGCC<br>TTTTCTTATGGACCTTGAAGGAAAACAGGGTAA<br>TTT                                                                                                                                                                                                                                                                                                                                                                                                                                                                               |         |
| RNase P synthetic<br>DNA target | gBlock                       | GAAATTAATACGACTCACTATAGGGGTGCTGT<br>GGAGGCTGAACTGGATCCAGTGGAATACACC<br>CTTAGGAAAAGGCTTCCCAGCCGCCTGCCCC<br>GGAGACCCAATGACATTTATGTCAACATGAAG<br>ACGGACTTTAAGGCCAGCTGGCCCGCTGCC<br>AGAAGCTGCTGGACGGAGGGGCCCGGGGTCA<br>GAACGCGTGCTCTGAGATCTACATTCACGGCT<br>TGGGCCTGGCCATCAACCGCGCCATCAACATC<br>GCGCTGCAGCTGCAGGCGGGCAGCTTCGGGT<br>CCTTGCAGGTGGCTGCCAATACCTCCACCGTG<br>GAGCTTGTTGATGAGCTGGAGCCAGAGACCG<br>ACACACGGGAGCCACTGACTCGGATCCGCAA<br>CAACTCAGCCATCCACATCCGAGTCTTCAGGG<br>TCACACCCAAGTAATTGAAAAGACACTCCTCC<br>ACTTATCCCCTCCGTGATATGGCTCTTCGCAT<br>GCTGAGTA | RNase P |
| 5C-HEX-reporter                 | Fluorescence<br>DNA reporter | 5' - /5HEX/CCCCC/3IABkFQ/-3'                                                                                                                                                                                                                                                                                                                                                                                                                                                                                                                                 | -       |
| 6U-FAM-reporter                 | Fluorescence<br>RNA reporter | 5'- /56-FAM/rUrUrUrUrU/3IABkFQ/-3'                                                                                                                                                                                                                                                                                                                                                                                                                                                                                                                           | -       |
| FAMBio 5C LFA<br>reporter       | LFA DNA<br>reporter          | /56-FAM/CCCCCCCCCCCC/3Bio/                                                                                                                                                                                                                                                                                                                                                                                                                                                                                                                                   | -       |
| FAMBio 14U LFA<br>reporter      | LFA RNA<br>reporter          | /5BiosG/rUrUrUrUrUrUrUrUrUrUrUrU/36-<br>FAM/                                                                                                                                                                                                                                                                                                                                                                                                                                                                                                                 | -       |
